# Supplementary material for: A Consumer Assessment of Fermented Green Coffee Beans with Common Beer/Wine Yeast Strains for Novel Flavor Properties
Source: MDPI journal article supplement (doi:10.3390/fermentation9100865), 2023-09-25
Supplement: s1 [file s1]

# Supplemental Tables

| PGY collection number | Strain commercial name           | Organism                         | Manufacturer     | Common fermentation product | Aroma trial descriptors                                    |
|-----------------------|----------------------------------|----------------------------------|------------------|-----------------------------|------------------------------------------------------------|
| OYL- 024              | Belgian Ale                      | <i>Saccharomyces cerevisiae</i>  | Omega Yeast Labs | Beer                        | Hazelnut, medium flavor intensity                          |
| OYL- 021              | Hefeweizen                       | <i>Saccharomyces cerevisiae</i>  | Omega Yeast Labs | Beer                        | Medium plus, flavor intensity, toast it walnut             |
| OYL- 400              | Bananza                          | <i>Saccharomyces cerevisiae</i>  | Omega Yeast Labs | Beer                        | Medium aroma intensity, woody                              |
| OYL- 402              | Cosmic Punch                     | <i>Saccharomyces cerevisiae</i>  | Omega Yeast Labs | Beer                        | Medium plus aroma intensity, hazelnut                      |
| OYL- 600              | L.Plantarum                      | <i>Saccharomyces cerevisiae</i>  | Omega Yeast Labs | Beer                        | Medium plus, brown sugar, medicine                         |
| OYL- 200              | Tropical IPA                     | <i>Saccharomyces cerevisiae</i>  | Omega Yeast Labs | Beer                        | cough syrup                                                |
| OYL- 205              | Fantame                          | <i>Saccharomyces cerevisiae</i>  | Omega Yeast Labs | Beer                        | High aroma intensity, coconut, fruity                      |
| PGY 329               | Biodiva                          | <i>Torulaspora delbrueckii</i>   | Lallemand Inc.   | Wine                        | Medium aroma intensity, rubber                             |
| PGY 327               | <i>Metschnikowia pulcherrima</i> | <i>Metschnikowia pulcherrima</i> | Lallemand Inc.   | Wine                        | Medium minus, peanuts                                      |
| PGY 71                | 71B                              | <i>Saccharomyces cerevisiae</i>  | Lallemand Inc.   | Wine                        | Medium flavor intensity, brown sugar                       |
| PGY 539               | Sourvisiae                       | <i>Saccharomyces cerevisiae</i>  | Lallemand Inc.   | Beer                        | Medium plus aroma intensity, toasted oak                   |
| PGY 83                | EC1118                           | <i>Saccharomyces bayanus</i>     | Lallemand Inc.   | Wine                        | Medium plus aroma intensity, brown sugar, dried red fruit. |

**Supplemental Table S1.** Commercial yeasts tested in the preliminary trial fermentation.

| Sample       | <i>*L</i>           | SD   | <i>*a</i>           | SD   | <i>*b</i>           | SD    |
|--------------|---------------------|------|---------------------|------|---------------------|-------|
| p Value      | <0.0001             |      | <0.0001             |      | <0.0001             |       |
| Belgian Ale  | 39.91 <sup>bc</sup> | 2.29 | 18.84 <sup>c</sup>  | 0.91 | 56.01 <sup>ab</sup> | 0.81  |
| Biodiva      | 37.73 <sup>bc</sup> | 5.26 | 20.69 <sup>bc</sup> | 2.31 | 55.14 <sup>ab</sup> | 2.32  |
| Sourvisiae   | 20.79 <sup>a</sup>  | 0.8  | 19.00 <sup>b</sup>  | 0.49 | 33.69 <sup>ab</sup> | 1.03  |
| Control      | 22.77 <sup>a</sup>  | 6.45 | 29.62 <sup>a</sup>  | 3.29 | 38.61 <sup>c</sup>  | 10.81 |
| 71B          | 31.15 <sup>ab</sup> | 1.51 | 22.72 <sup>ab</sup> | 0.98 | 50.08 <sup>bc</sup> | 1.5   |
| Tropical IPA | 43.7 <sup>c</sup>   | 4.54 | 16.53 <sup>bc</sup> | 1.84 | 55.15 <sup>a</sup>  | 0.64  |

**Supplemental Table S2.** *\*L* *\*a* *\*b* values of inoculated and uninoculated control samples. The numbers with different letters indicate a significant difference (p<0.05) between samples. The color parameters measured in the samples include *\*L* (darkness/lightness), *\*a* (greenness/redness), and *\*b* (yellowness/blueness) For both *\*a* and *\*b*, measurement of 0 represents a neutral color.
